# Supplementary material for: Assessing the clinical utility of genetic risk scores for targeted cancer screening
Source: PubMed Central journal article supplement (PMC7821544; doi:10.1186/s12967-020-02699-w), 2021-01-22

# Appendix A

Recommended screening guidelines incorporating GRS values provided to primary care providers involved in this study.

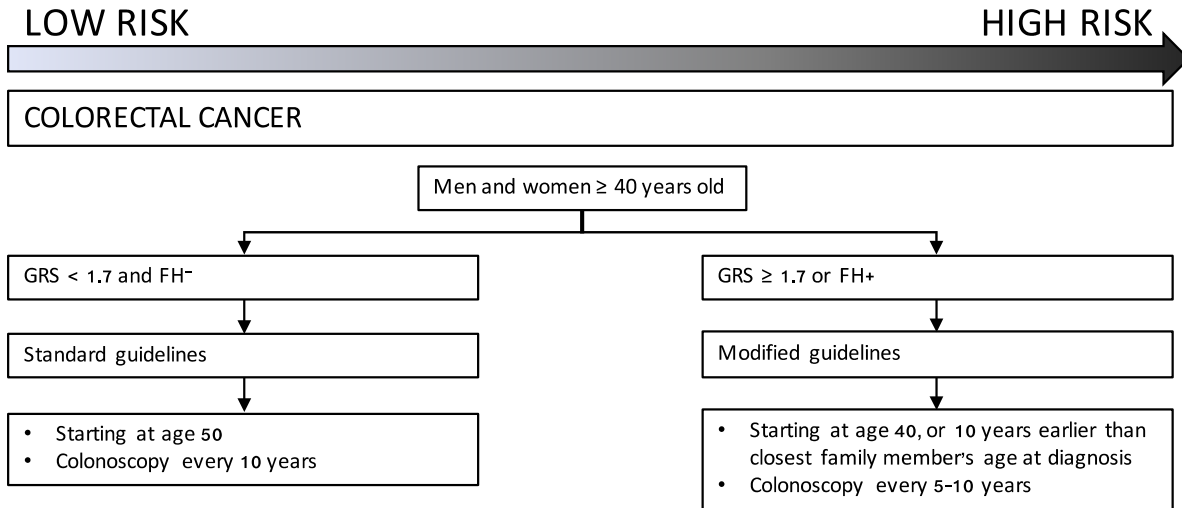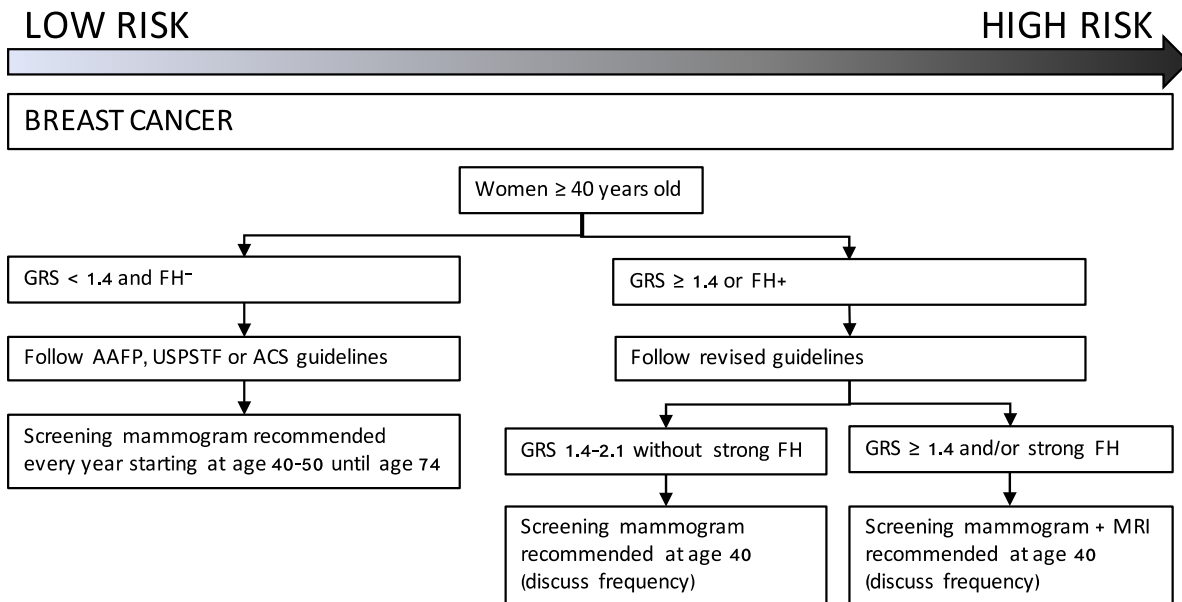

# Appendix A (Continued)

LOW RISK

HIGH RISK

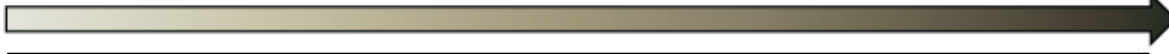

PROSTATE CANCER

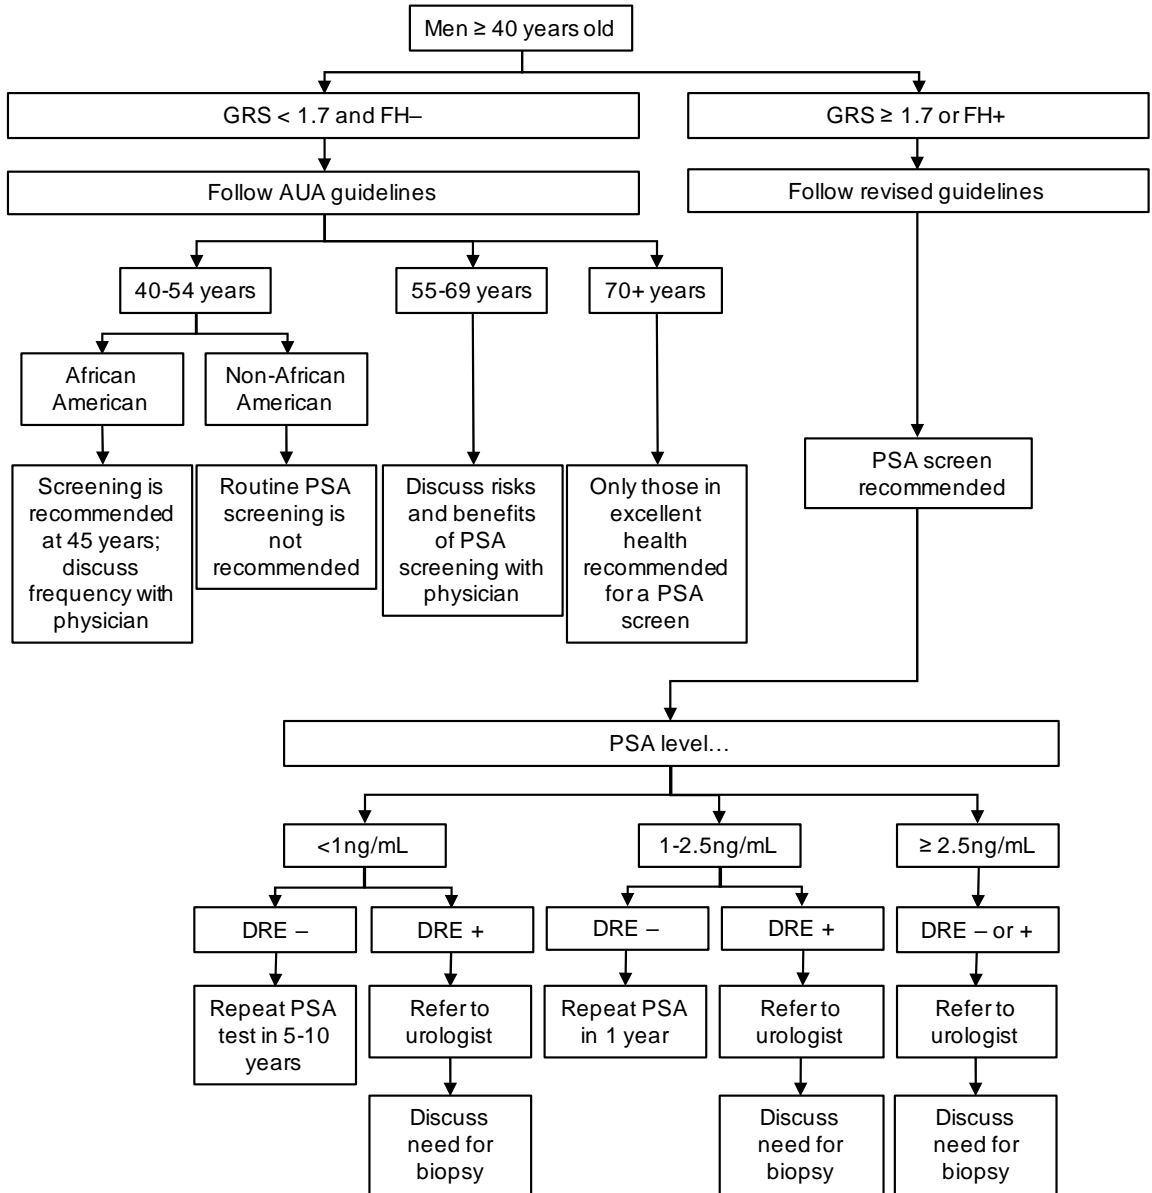

Supplement: 12967_2020_2699_MOESM1_ESM.pdf [file 12967_2020_2699_MOESM1_ESM.pdf]
