# Supplementary material for: Assessing the clinical utility of genetic risk scores for targeted cancer screening
Source: PubMed Central journal article supplement (PMC7821544; doi:10.1186/s12967-020-02699-w), 2021-01-22
Supplement: 12967_2020_2699_MOESM3_ESM.pdf [file 12967_2020_2699_MOESM3_ESM.pdf]

Supplementary Table 2. Risk-associated SNPs used for calculating Genetic Risk Scores

| SNP                                | CHR | POS       | RA | RAF      | OR   |
|------------------------------------|-----|-----------|----|----------|------|
| <b>Prostate cancer (Caucasian)</b> |     |           |    |          |      |
| rs636291                           | 1   | 10556097  | A  | 0.475272 | 1.18 |
| rs17599629                         | 1   | 150658287 | G  | 0.04554  | 1.1  |
| rs1218582                          | 1   | 154834183 | G  | 0.183098 | 1.06 |
| rs4245739                          | 1   | 204518842 | A  | 0.570025 | 1.1  |
| rs11902236                         | 2   | 10117868  | T  | 0.071182 | 1.07 |
| rs9287719                          | 2   | 10710730  | C  | 0.203672 | 1.07 |
| rs1465618                          | 2   | 43553949  | T  | 0.051076 | 1.27 |
| rs721048                           | 2   | 63131731  | A  | 0.029344 | 1.15 |
| rs10187424                         | 2   | 85794297  | T  | 0.342927 | 1.19 |
| rs12621278                         | 2   | 173311553 | A  | 0.889815 | 1.35 |
| rs2292884                          | 2   | 238443226 | G  | 0.053824 | 1.14 |
| rs3771570                          | 2   | 242382864 | T  | 0.021141 | 1.12 |
| rs2660753                          | 3   | 87110674  | T  | 0.014328 | 1.18 |
| rs7611694                          | 3   | 113275624 | A  | 0.320356 | 1.1  |
| rs10934853                         | 3   | 128038373 | A  | 0.083868 | 1.12 |
| rs6763931                          | 3   | 141102833 | A  | 0.181561 | 1.18 |
| rs10936632                         | 3   | 170130102 | A  | 0.267599 | 1.14 |
| rs10009409                         | 4   | 73855253  | T  | 0.095914 | 1.09 |
| rs1894292                          | 4   | 74349158  | G  | 0.280794 | 1.1  |
| rs12500426                         | 4   | 95514609  | A  | 0.211324 | 1.07 |
| rs7679673                          | 4   | 106061534 | C  | 0.337561 | 1.19 |
| rs2121875                          | 5   | 44365545  | C  | 0.100743 | 1.09 |
| rs6869841                          | 5   | 172939426 | T  | 0.043639 | 1.07 |
| rs4713266                          | 6   | 11219030  | C  | 0.282067 | 1.07 |
| rs115457135                        | 6   | 30073776  | A  | 0.045071 | 1.08 |
| rs130067                           | 6   | 31118511  | G  | 0.038848 | 1.2  |
| rs3096702                          | 6   | 32192331  | A  | 0.13235  | 1.07 |
| rs115306967                        | 6   | 32400939  | G  | 0.458735 | 1.08 |
| rs1983891                          | 6   | 41536427  | T  | 0.08151  | 1.1  |
| rs2273669                          | 6   | 109285189 | G  | 0.021141 | 1.07 |
| rs339331                           | 6   | 117210052 | T  | 0.457517 | 1.13 |
| rs1933488                          | 6   | 153441079 | A  | 0.318096 | 1.12 |
| rs9364554                          | 6   | 160833664 | T  | 0.07393  | 1.17 |
| rs12155172                         | 7   | 20994491  | A  | 0.055319 | 1.11 |
| rs56232506                         | 7   | 47437244  | A  | 0.220994 | 1.07 |
| rs6465657                          | 7   | 97816327  | C  | 0.227529 | 1.12 |
| rs2928679                          | 8   | 23438975  | A  | 0.185502 | 1.53 |
| rs1512268                          | 8   | 23526463  | T  | 0.182158 | 1.23 |
| rs11135910                         | 8   | 25892142  | T  | 0.021815 | 1.11 |

|            |    |           |   |          |      |
|------------|----|-----------|---|----------|------|
| rs12543663 | 8  | 127924659 | C | 0.095172 | 1.07 |
| rs10086908 | 8  | 128011937 | T | 0.504668 | 1.25 |
| rs1016343  | 8  | 128093297 | T | 0.042766 | 1.28 |
| rs13252298 | 8  | 128095156 | A | 0.495475 | 1.1  |
| rs6983561  | 8  | 128106880 | C | 0.000967 | 1.61 |
| rs16902094 | 8  | 128320346 | G | 0.024806 | 1.21 |
| rs445114   | 8  | 128323181 | T | 0.409728 | 1.1  |
| rs16902104 | 8  | 128340908 | T | 0.024712 | 1.21 |
| rs7000448  | 8  | 128441170 | T | 0.134689 | 1.08 |
| rs11986220 | 8  | 128531689 | A | 0.011513 | 1.56 |
| rs17694493 | 9  | 22041998  | G | 0.018906 | 1.1  |
| rs76934034 | 10 | 46082985  | T | 0.822649 | 1.14 |
| rs10993994 | 10 | 51549496  | T | 0.139054 | 1.57 |
| rs3850699  | 10 | 104414221 | A | 0.461177 | 1.1  |
| rs4962416  | 10 | 126696872 | C | 0.072092 | 1.46 |
| rs7127900  | 11 | 2233574   | A | 0.04012  | 1.28 |
| rs10896449 | 11 | 68994667  | G | 0.235031 | 1.41 |
| rs11568818 | 11 | 102401661 | T | 0.32707  | 1.1  |
| rs11214775 | 11 | 113807181 | G | 0.515524 | 1.08 |
| rs80130819 | 12 | 48419618  | A | 0.824827 | 1.13 |
| rs10875943 | 12 | 49676010  | C | 0.087675 | 1.18 |
| rs902774   | 12 | 53273904  | A | 0.021258 | 1.17 |
| rs1270884  | 12 | 114685571 | A | 0.241769 | 1.07 |
| rs11839053 | 13 | 107063042 | C | 0.001927 | 1.54 |
| rs8008270  | 14 | 53372330  | C | 0.653187 | 1.12 |
| rs7141529  | 14 | 69126744  | C | 0.235031 | 1.09 |
| rs8014671  | 14 | 71092256  | G | 0.35988  | 1.07 |
| rs684232   | 17 | 618965    | C | 0.129744 | 1.1  |
| rs11649743 | 17 | 36074979  | G | 0.66896  | 1.5  |
| rs7501939  | 17 | 36101156  | C | 0.392502 | 1.19 |
| rs11650494 | 17 | 47345186  | A | 0.00461  | 1.15 |
| rs1859962  | 17 | 69108753  | G | 0.237364 | 1.2  |
| rs7241993  | 18 | 76773973  | C | 0.48986  | 1.09 |
| rs8102476  | 19 | 38735613  | C | 0.289444 | 1.12 |
| rs887391   | 19 | 41985624  | T | 0.597374 | 1.15 |
| rs2735839  | 19 | 51364623  | G | 0.751689 | 1.2  |
| rs12480328 | 20 | 49527922  | T | 0.869183 | 1.13 |
| rs2427345  | 20 | 61015611  | C | 0.400689 | 1.06 |
| rs6062509  | 20 | 62362563  | T | 0.495616 | 1.12 |
| rs1041449  | 21 | 42901421  | G | 0.196338 | 1.06 |
| rs2238776  | 22 | 19757892  | G | 0.621732 | 1.09 |
| rs9623117  | 22 | 40452119  | C | 0.047611 | 1.18 |

|           |    |          |   |          |      |
|-----------|----|----------|---|----------|------|
| rs5759167 | 22 | 43500212 | G | 0.253311 | 1.14 |
| rs2405942 | X  | 9814135  | A | 0.615126 | 1.14 |
| rs5945572 | X  | 51229683 | A | 0.128236 | 1.07 |
| rs2807031 | X  | 52896949 | C | 0.0314   | 1.07 |
| rs5919432 | X  | 67021550 | T | 0.641921 | 1.09 |
| rs6625711 | X  | 70139850 | A | 0.031082 | 1.07 |
| rs4844289 | X  | 70407983 | G | 0.144172 | 1.05 |

**Prostate cancer (African American)**

|             |    |           |   |          |          |
|-------------|----|-----------|---|----------|----------|
| rs4245739   | 1  | 204518842 | A | 0.595058 | 1.09     |
| rs10187424  | 2  | 85794297  | T | 0.125387 | 0.833333 |
| rs12621278  | 2  | 173311553 | A | 0.973577 | 1.48     |
| rs2292884   | 2  | 238443226 | G | 0.316406 | 1.1      |
| rs7679673   | 4  | 106061534 | C | 0.147994 | 1.14     |
| rs12653946  | 5  | 1895829   | T | 0.15992  | 1.09     |
| rs130067    | 6  | 31118511  | G | 0.036941 | 0.82     |
| rs1983891   | 6  | 41536427  | T | 0.232613 | 1.12     |
| rs339331    | 6  | 117210052 | T | 0.583543 | 1.19     |
| rs9364554   | 6  | 160833664 | T | 0.004369 | 1.18     |
| rs10486567  | 7  | 27976563  | G | 0.511654 | 1.19     |
| rs56232506  | 7  | 47437244  | A | 0.01199  | 1.29     |
| rs1512268   | 8  | 23526463  | T | 0.416799 | 0.862069 |
| rs12543663  | 8  | 127924659 | A | 0.743561 | 1.162791 |
| rs10086908  | 8  | 128011937 | T | 0.575171 | 1.28     |
| rs13252298  | 8  | 128095156 | A | 0.868065 | 1.15     |
| rs6983561   | 8  | 128106880 | C | 0.198025 | 1.29     |
| rs116041037 | 8  | 128131809 | A | 0.000949 | 2.67     |
| rs445114    | 8  | 128323181 | T | 0.1133   | 1.09     |
| rs6983267   | 8  | 128413305 | G | 0.80425  | 1.33     |
| rs7000448   | 8  | 128441170 | T | 0.450509 | 1.14     |
| rs11986220  | 8  | 128531689 | A | 0.003931 | 1.38     |
| rs817826    | 9  | 110156300 | C | 0.088506 | 1.08     |
| rs10993994  | 10 | 51549496  | T | 0.369542 | 1.1      |
| rs7127900   | 11 | 2233574   | A | 0.134396 | 1.1      |
| rs10896449  | 11 | 68994667  | G | 0.478034 | 1.15     |
| rs10875943  | 12 | 49676010  | C | 0.397404 | 1.15     |
| rs1270884   | 12 | 114685571 | A | 0.036902 | 1.22     |
| rs684232    | 17 | 618965    | C | 0.43178  | 0.925926 |
| rs11650494  | 17 | 47345186  | A | 0.055413 | 1.1      |
| rs7210100   | 17 | 47436749  | A | 0.003158 | 1.51     |
| rs8102476   | 19 | 38735613  | C | 0.565504 | 1.08     |
| rs5759167   | 22 | 43500212  | G | 0.568667 | 1.15     |
| rs5945572   | X  | 51229683  | A | 0.081796 | 1.08     |

|                                     |    |           |   |          |          |
|-------------------------------------|----|-----------|---|----------|----------|
| rs5919432                           | X  | 67021550  | T | 0.146153 | 0.900901 |
| <b>Prostate cancer (East Asian)</b> |    |           |   |          |          |
| rs13385191                          | 2  | 20888265  | G | 0.162812 | 1.1      |
| rs1465618                           | 2  | 43553949  | T | 0.541696 | 1.17     |
| rs721048                            | 2  | 63131731  | A | 0.001624 | 1.39     |
| rs10187424                          | 2  | 85794297  | T | 0.362645 | 1.12     |
| rs12621278                          | 2  | 173311553 | A | 0.523452 | 1.14     |
| rs2660753                           | 3  | 87110674  | T | 0.054429 | 1.19     |
| rs2055109                           | 3  | 87467332  | C | 0.00257  | 1.29     |
| rs7611694                           | 3  | 113275624 | A | 0.096162 | 1.16     |
| rs6763931                           | 3  | 141102833 | A | 0.102208 | 1.11     |
| rs7679673                           | 4  | 106061534 | C | 0.041209 | 1.16     |
| rs12653946                          | 5  | 1895829   | T | 0.104717 | 1.26     |
| rs1983891                           | 6  | 41536427  | T | 0.104329 | 1.15     |
| rs339331                            | 6  | 117210052 | T | 0.411651 | 1.23     |
| rs9364554                           | 6  | 160833664 | C | 0.494209 | 1.1      |
| rs12155172                          | 7  | 20994491  | A | 0.065331 | 1.14     |
| rs10486567                          | 7  | 27976563  | G | 0.014352 | 1.15     |
| rs6465657                           | 7  | 97816327  | C | 0.742527 | 1.14     |
| rs1512268                           | 8  | 23526463  | T | 0.087143 | 1.32     |
| rs10086908                          | 8  | 128011937 | T | 0.67947  | 1.2      |
| rs13252298                          | 8  | 128095156 | A | 0.437318 | 1.38     |
| rs16901979                          | 8  | 128124916 | A | 0.06938  | 1.39     |
| rs620861                            | 8  | 128335673 | G | 0.32707  | 1.13     |
| rs6983267                           | 8  | 128413305 | G | 0.167526 | 1.23     |
| rs1447295                           | 8  | 128485038 | A | 0.020678 | 1.54     |
| rs817826                            | 9  | 110156300 | C | 0.012078 | 1.49     |
| rs10993994                          | 10 | 51549496  | T | 0.236002 | 1.2      |
| rs3850699                           | 10 | 104414221 | A | 0.633934 | 1.17     |
| rs2252004                           | 10 | 122844709 | C | 0.48567  | 1.17     |
| rs12791447                          | 11 | 7556577   | G | 0.012522 | 1.23     |
| rs1938781                           | 11 | 58915110  | G | 0.093452 | 1.17     |
| rs11568818                          | 11 | 102401661 | T | 0.852668 | 1.21     |
| rs10875943                          | 12 | 49676010  | C | 0.732051 | 1.15     |
| rs9600079                           | 13 | 73728139  | T | 0.222878 | 1.24     |
| rs7153648                           | 14 | 61122526  | C | 0.029515 | 1.15     |
| rs58262369                          | 14 | 64693912  | T | 0.010878 | 1.28     |
| rs11649743                          | 17 | 36074979  | G | 0.445289 | 1.18     |
| rs4430796                           | 17 | 36098040  | A | 0.514519 | 1.23     |
| rs7241993                           | 18 | 76773973  | C | 0.32982  | 1.14     |
| rs887391                            | 19 | 41985624  | T | 0.36857  | 1.1      |
| rs103294                            | 19 | 54797848  | C | 0.257455 | 1.34     |

|                                  |    |           |   |          |      |
|----------------------------------|----|-----------|---|----------|------|
| rs5759167                        | 22 | 43500212  | G | 0.473482 | 1.15 |
| <b>Breast cancer (Caucasian)</b> |    |           |   |          |      |
| rs616488                         | 1  | 10566215  | A | 0.455355 | 1.06 |
| rs11552449                       | 1  | 114448389 | T | 0.030276 | 1.07 |
| rs11249433                       | 1  | 121280613 | G | 0.151165 | 1.09 |
| rs12405132                       | 1  | 145644984 | C | 0.378102 | 1.05 |
| rs12048493                       | 1  | 149927034 | C | 0.147686 | 1.07 |
| rs72755295                       | 1  | 242034263 | G | 0.001005 | 1.15 |
| rs12710696                       | 2  | 19320803  | T | 0.128881 | 1.1  |
| rs4849887                        | 2  | 121245122 | C | 0.820836 | 1.1  |
| rs2016394                        | 2  | 172972971 | G | 0.272797 | 1.05 |
| rs1550623                        | 2  | 174212894 | A | 0.721141 | 1.06 |
| rs1045485                        | 2  | 202149589 | G | 0.763701 | 1.03 |
| rs13387042                       | 2  | 217905832 | A | 0.271754 | 1.14 |
| rs16857609                       | 2  | 218296508 | T | 0.063454 | 1.08 |
| rs6762644                        | 3  | 4742276   | G | 0.1444   | 1.07 |
| rs4973768                        | 3  | 27416013  | T | 0.221558 | 1.11 |
| rs12493607                       | 3  | 30682939  | C | 0.130755 | 1.06 |
| rs6796502                        | 3  | 46866866  | G | 0.807662 | 1.09 |
| rs1053338                        | 3  | 63967900  | G | 0.01486  | 1.08 |
| rs9790517                        | 4  | 106084778 | T | 0.057648 | 1.05 |
| rs6828523                        | 4  | 175846426 | C | 0.770357 | 1.11 |
| rs10069690                       | 5  | 1279790   | T | 0.070437 | 1.06 |
| rs2736108                        | 5  | 1297488   | C | 0.518976 | 1.06 |
| rs13162653                       | 5  | 16187528  | G | 0.286332 | 1.05 |
| rs2012709                        | 5  | 32567732  | T | 0.236682 | 1.05 |
| rs10941679                       | 5  | 44706498  | G | 0.0661   | 1.12 |
| rs889312                         | 5  | 56031884  | C | 0.08191  | 1.12 |
| rs2229882                        | 5  | 56168712  | T | 0.002247 | 1.45 |
| rs10472076                       | 5  | 58184061  | C | 0.145466 | 1.05 |
| rs1353747                        | 5  | 58337481  | T | 0.80946  | 1.09 |
| rs7707921                        | 5  | 81538046  | A | 0.56716  | 1.08 |
| rs1432679                        | 5  | 158244083 | C | 0.180285 | 1.07 |
| rs11242675                       | 6  | 1318878   | T | 0.387382 | 1.04 |
| rs204247                         | 6  | 13722523  | G | 0.191581 | 1.05 |
| rs9257408                        | 6  | 28926220  | C | 0.143111 | 1.05 |
| rs17529111                       | 6  | 82128386  | C | 0.046354 | 1.06 |
| rs2180341                        | 6  | 127600630 | G | 0.064567 | 1.41 |
| rs12662670                       | 6  | 151918856 | G | 0.004556 | 1.17 |
| rs2046210                        | 6  | 151948366 | A | 0.104071 | 1.08 |
| rs6964587                        | 7  | 91630620  | T | 0.143035 | 1.05 |
| rs4593472                        | 7  | 130667121 | C | 0.425887 | 1.05 |

|            |    |           |   |          |      |
|------------|----|-----------|---|----------|------|
| rs720475   | 7  | 144074929 | G | 0.569572 | 1.06 |
| rs9693444  | 8  | 29509616  | A | 0.100552 | 1.07 |
| rs13365225 | 8  | 36858483  | A | 0.651895 | 1.05 |
| rs6472903  | 8  | 76230301  | T | 0.684094 | 1.1  |
| rs2943559  | 8  | 76417937  | G | 0.004928 | 1.13 |
| rs13267382 | 8  | 117209548 | A | 0.137641 | 1.05 |
| rs13281615 | 8  | 128355618 | G | 0.177157 | 1.09 |
| rs11780156 | 8  | 129194641 | T | 0.029618 | 1.07 |
| rs1011970  | 9  | 22062134  | T | 0.028359 | 1.06 |
| rs10759243 | 9  | 110306115 | A | 0.085322 | 1.05 |
| rs865686   | 9  | 110888478 | T | 0.412549 | 1.2  |
| rs2380205  | 10 | 5886734   | C | 0.303821 | 1.06 |
| rs7072776  | 10 | 22032942  | A | 0.079863 | 1.07 |
| rs11814448 | 10 | 22315843  | C | 0.000471 | 1.27 |
| rs10995190 | 10 | 64278682  | G | 0.69289  | 1.16 |
| rs704010   | 10 | 80841148  | T | 0.136013 | 1.08 |
| rs7904519  | 10 | 114773927 | G | 0.219492 | 1.05 |
| rs11199914 | 10 | 123093901 | C | 0.465397 | 1.05 |
| rs2981579  | 10 | 123337335 | A | 0.158643 | 1.27 |
| rs3817198  | 11 | 1909006   | C | 0.092903 | 1.07 |
| rs3903072  | 11 | 65583066  | G | 0.263066 | 1.05 |
| rs614367   | 11 | 69328764  | T | 0.025889 | 1.21 |
| rs78540526 | 11 | 69331418  | T | 0.007621 | 1.34 |
| rs554219   | 11 | 69331642  | G | 0.017583 | 1.26 |
| rs11820646 | 11 | 129461171 | C | 0.385144 | 1.05 |
| rs12422552 | 12 | 14413931  | C | 0.058903 | 1.04 |
| rs10771399 | 12 | 28155080  | A | 0.790321 | 1.16 |
| rs17356907 | 12 | 96027759  | A | 0.486646 | 1.1  |
| rs1292011  | 12 | 115836522 | A | 0.337096 | 1.09 |
| rs2236007  | 14 | 37132769  | G | 0.610899 | 1.08 |
| rs2588809  | 14 | 68660428  | T | 0.021638 | 1.08 |
| rs999737   | 14 | 69034682  | C | 0.578512 | 1.09 |
| rs941764   | 14 | 91841069  | G | 0.119163 | 1.07 |
| rs11627032 | 14 | 93104072  | T | 0.558457 | 1.06 |
| rs8051542  | 16 | 52534167  | T | 0.2053   | 1.09 |
| rs3803662  | 16 | 52586341  | A | 0.078008 | 1.24 |
| rs3112612  | 16 | 52635164  | A | 0.176988 | 1.15 |
| rs17817449 | 16 | 53813367  | T | 0.3312   | 1.08 |
| rs13329835 | 16 | 80650805  | G | 0.051438 | 1.08 |
| rs6504950  | 17 | 53056471  | G | 0.528674 | 1.06 |
| rs745570   | 17 | 77781725  | A | 0.243838 | 1.05 |
| rs527616   | 18 | 24337424  | G | 0.370272 | 1.05 |

|           |    |          |   |          |      |
|-----------|----|----------|---|----------|------|
| rs1436904 | 18 | 24570667 | T | 0.372832 | 1.04 |
| rs6507583 | 18 | 42399590 | A | 0.876658 | 1.1  |
| rs3745185 | 19 | 17384267 | G | 0.296698 | 1.16 |
| rs2363956 | 19 | 17394124 | T | 0.22553  | 1.03 |
| rs4808801 | 19 | 18571141 | A | 0.428763 | 1.08 |
| rs3760982 | 19 | 44286513 | A | 0.212982 | 1.05 |
| rs2284378 | 20 | 32588095 | C | 0.461448 | 1.05 |
| rs2823093 | 21 | 16520832 | G | 0.536556 | 1.09 |
| rs132390  | 22 | 29621477 | C | 0.00105  | 1.14 |
| rs6001930 | 22 | 40876234 | C | 0.014066 | 1.12 |

**Breast cancer (African American)**

|            |    |           |   |          |      |
|------------|----|-----------|---|----------|------|
| rs4849887  | 2  | 121245122 | C | 0.473069 | 1.16 |
| rs13387042 | 2  | 217905832 | A | 0.540372 | 1.12 |
| rs16857609 | 2  | 218296508 | T | 0.056596 | 1.17 |
| rs10069690 | 5  | 1279790   | T | 0.345979 | 1.13 |
| rs204247   | 6  | 13722523  | G | 0.121592 | 1.13 |
| rs2981579  | 10 | 123337335 | A | 0.371246 | 1.18 |
| rs2981578  | 10 | 123340311 | C | 0.751516 | 1.28 |
| rs999737   | 14 | 69034682  | C | 0.916423 | 1.59 |
| rs8051542  | 16 | 52534167  | T | 0.098094 | 1.4  |
| rs17817449 | 16 | 53813367  | T | 0.362284 | 1.21 |
| rs2363956  | 19 | 17394124  | T | 0.25     | 1.14 |

**Breast cancer (East Asian)**

|            |    |           |   |          |      |
|------------|----|-----------|---|----------|------|
| rs13393577 | 2  | 213296863 | C | 0.00252  | 1.53 |
| rs16857609 | 2  | 218296508 | T | 0.370394 | 1.12 |
| rs4973768  | 3  | 27416013  | T | 0.033893 | 1.12 |
| rs6788895  | 3  | 150467808 | G | 0.396018 | 1.22 |
| rs4415084  | 5  | 44662515  | C | 0.190009 | 1.12 |
| rs889312   | 5  | 56031884  | C | 0.329361 | 1.16 |
| rs1419026  | 6  | 82089179  | T | 0.079919 | 1.07 |
| rs9485372  | 6  | 149608874 | G | 0.343982 | 1.11 |
| rs2046210  | 6  | 151948366 | A | 0.13061  | 1.28 |
| rs9693444  | 8  | 29509616  | A | 0.087261 | 1.15 |
| rs10822013 | 10 | 64251977  | T | 0.235322 | 1.12 |
| rs941827   | 10 | 114558887 | T | 0.601866 | 1.05 |
| rs2981578  | 10 | 123340311 | C | 0.304704 | 1.23 |
| rs17221259 | 12 | 14410485  | C | 0.057648 | 1.25 |
| rs3803662  | 16 | 52586341  | A | 0.412036 | 1.21 |
| rs4784227  | 16 | 52599188  | T | 0.061901 | 1.25 |

**Colorectal cancer (Caucasian)**

|            |   |           |   |          |      |
|------------|---|-----------|---|----------|------|
| rs10911251 | 1 | 183081194 | A | 0.328329 | 1.09 |
| rs6691170  | 1 | 222045446 | T | 0.137196 | 1.06 |

|            |    |           |   |          |      |
|------------|----|-----------|---|----------|------|
| rs6687758  | 1  | 222164948 | G | 0.043222 | 1.09 |
| rs11903757 | 2  | 192587204 | C | 0.025664 | 1.16 |
| rs992157   | 2  | 219154781 | A | 0.322056 | 1.1  |
| rs10936599 | 3  | 169492101 | C | 0.563851 | 1.04 |
| rs367615   | 5  | 108948937 | T | 0.651733 | 1.35 |
| rs647161   | 5  | 134499092 | A | 0.435732 | 1.07 |
| rs1321311  | 6  | 36622900  | A | 0.055838 | 1.1  |
| rs16892766 | 8  | 117630683 | C | 0.006416 | 1.27 |
| rs7014346  | 8  | 128424792 | A | 0.131696 | 1.19 |
| rs10795668 | 10 | 8701219   | A | 0.10106  | 1.12 |
| rs704017   | 10 | 80819132  | G | 0.333968 | 1.06 |
| rs1035209  | 10 | 101345366 | T | 0.038025 | 1.13 |
| rs1535     | 11 | 61597972  | A | 0.431518 | 1.07 |
| rs3824999  | 11 | 74345550  | G | 0.246214 | 1.08 |
| rs3802842  | 11 | 111171709 | C | 0.076895 | 1.11 |
| rs3217810  | 12 | 4388271   | T | 0.016667 | 1.19 |
| rs3217901  | 12 | 4405389   | G | 0.180285 | 1.1  |
| rs7136702  | 12 | 50880216  | T | 0.113502 | 1.06 |
| rs11169552 | 12 | 51155663  | C | 0.500132 | 1.09 |
| rs59336    | 12 | 115116352 | T | 0.2494   | 1.09 |
| rs4444235  | 14 | 54410919  | C | 0.200883 | 1.11 |
| rs1957636  | 14 | 54560018  | T | 0.15437  | 1.08 |
| rs4779584  | 15 | 32994756  | C | 0.637123 | 1.18 |
| rs9929218  | 16 | 68820946  | G | 0.510082 | 1.1  |
| rs4939827  | 18 | 46453463  | T | 0.267186 | 1.2  |
| rs10411210 | 19 | 33532300  | C | 0.803892 | 1.15 |
| rs961253   | 20 | 6404281   | A | 0.121383 | 1.12 |
| rs4813802  | 20 | 6699595   | G | 0.12468  | 1.09 |
| rs2423279  | 20 | 7812350   | C | 0.061405 | 1.07 |
| rs4925386  | 20 | 60921044  | C | 0.513946 | 1.08 |
| rs5934683  | X  | 9751474   | T | 0.11813  | 1.07 |

**Colorectal cancer (African American)**

|            |    |           |   |          |      |
|------------|----|-----------|---|----------|------|
| rs647161   | 5  | 134499092 | A | 0.315844 | 1.14 |
| rs16892766 | 8  | 117630683 | C | 0.016358 | 1.18 |
| rs6983267  | 8  | 128413305 | G | 0.80425  | 1.2  |
| rs3824999  | 11 | 74345550  | G | 0.027956 | 1.15 |

**Colorectal cancer (East Asian)**

|           |   |           |   |          |      |
|-----------|---|-----------|---|----------|------|
| rs6687758 | 1 | 222164948 | G | 0.042312 | 1.12 |
| rs647161  | 5 | 134499092 | A | 0.115532 | 1.15 |
| rs1321311 | 6 | 36622900  | A | 0.03393  | 1.09 |
| rs7758229 | 6 | 160840252 | T | 0.054569 | 1.28 |
| rs6983267 | 8 | 128413305 | G | 0.167526 | 1.14 |



|            |    |           |   |          |      |
|------------|----|-----------|---|----------|------|
| rs10795668 | 10 | 8701219   | G | 0.405387 | 1.15 |
| rs704017   | 10 | 80819132  | G | 0.080713 | 1.1  |
| rs11196172 | 10 | 114726843 | A | 0.448364 | 1.14 |
| rs1535     | 11 | 61597972  | A | 0.18122  | 1.15 |
| rs3824999  | 11 | 74345550  | G | 0.156816 | 1.06 |
| rs10774214 | 12 | 4368352   | T | 0.0961   | 1.17 |
| rs10849432 | 12 | 6385727   | T | 0.619999 | 1.14 |
| rs2238126  | 12 | 12009741  | G | 0.26061  | 1.17 |
| rs4779584  | 15 | 32994756  | T | 0.637283 | 1.12 |
| rs12603526 | 17 | 800593    | C | 0.060025 | 1.1  |
| rs7229639  | 18 | 46450976  | A | 0.022741 | 1.2  |
| rs4939827  | 18 | 46453463  | T | 0.095666 | 1.12 |
| rs10411210 | 19 | 33532300  | C | 0.64497  | 1.15 |
| rs1800469  | 19 | 41860296  | G | 0.177662 | 1.09 |
| rs2423279  | 20 | 7812350   | C | 0.106341 | 1.13 |

---

Abbreviations: SNP, single nucleotide polymorphisms; CHR, chromosome; POS, position; RA, risk allele; RAF, risk allele frequency; OR, odds ratio.
